# Supplementary material for: The Experiences of Older Adults with Dementia of “Balance Wise”—An Individual or Group-Delivered Exercise Programme: A Qualitative Study
Source: MDPI journal article supplement (doi:10.3390/disabilities4010002), 2023-12-27
Supplement: s1 [file s1]

**Table S1.** The main features of the Balance Wise Programme.

| Content                   | Variations                                           |                        |                                                  |                                        |                                                      |
|---------------------------|------------------------------------------------------|------------------------|--------------------------------------------------|----------------------------------------|------------------------------------------------------|
|                           | Level of Difficulty Increase by Week                 |                        |                                                  |                                        |                                                      |
|                           | Week 1–2                                             | Week 3–4               | Week 5–6                                         | Week 7–8                               | Week 9–10                                            |
| Warming up and stretching |                                                      |                        |                                                  |                                        |                                                      |
| Throwing and passing      | √ (seated)                                           | √ (seated)             | √ multiple sizes of ball (standing)              | √ multiple sizes of ball (standing)    | √ multiple sizes of ball (standing)                  |
| Head stretch              | √ (seated)                                           | √ (seated)             | √ (standing)                                     | √ (standing)                           | √ (standing)                                         |
| Leg stretch               | √ (seated)                                           | √ (seated)             | √ (standing)                                     | √ (standing)                           | √ (standing)                                         |
| Trunk stretch             | √ (seated)                                           | √ (seated)             | √ (standing)                                     | √ (standing)                           | √ (standing)                                         |
| Cognitive elements        |                                                      |                        |                                                  |                                        |                                                      |
| Counting                  | √ - walking and counting                             |                        | √ - walking and counting–multiple currency       |                                        |                                                      |
| Memorising                | √ - memorising ingredients for baking a cake         |                        |                                                  |                                        | √ - memorising a direction                           |
| Hand-eye coordination     | √ - standing small BOS and passing balls into target |                        |                                                  |                                        |                                                      |
| Strengthening             |                                                      |                        |                                                  |                                        |                                                      |
| Knee extensor             | 10 reps, HS                                          | 10 reps, HS            | 10 reps, HS (↑weight)                            | 10 reps, NS                            | 10 reps, NS (↑weight)                                |
| Knee flexor               |                                                      |                        |                                                  |                                        |                                                      |
| Hip abductor              | 10 reps (seated)                                     | 10 reps (seated)       | 10 reps (seated, ↑weight)                        | 10 reps (seated)                       | 10 reps (seated, ↑weight)                            |
| Ankle PF                  |                                                      |                        |                                                  |                                        |                                                      |
| Ankle DF dorsiflex        |                                                      |                        |                                                  |                                        |                                                      |
| Walking                   |                                                      |                        |                                                  |                                        |                                                      |
| Walking                   | Walking around the chair supported                   | Walking in figure of 8 | Walking around the chair and squatting supported | Walking on medium-density foam         | Walking with holding full cups of water              |
| Sideways walking          | ST                                                   | ST with squatting      | Side stepping on bench WS                        |                                        | ST with obstacles – clear the foot from green hurdle |
| Heel walking              | Heel walking WH                                      | Heel walking           | Heel walking                                     |                                        |                                                      |
| Toe walking               | Toe walking WH                                       | Toe walking NS         | Toe walking NS                                   |                                        |                                                      |
| Backward walking          | Backward walking WH                                  | Backward walking NS    | Backward walking in figure of eight WH           | Backward walking in figure of eight NS |                                                      |
| Tandem walking            | Tandem walking WH                                    |                        |                                                  | Tandem walking no support              | Tandem walking on bench                              |
| Backward tandem walking   |                                                      |                        |                                                  | Backward tandem walking WS             | Backward tandem walking NS                           |
| Stairs climbing           | Stair climbing                                       |                        |                                                  |                                        |                                                      |

|                                                                                                                                                                                                                                                                                       |                                                                                                                                        |                                                                                                                                        |                                                                                                                                        |                                                                                                                                        |                                                                                                                                        |
|---------------------------------------------------------------------------------------------------------------------------------------------------------------------------------------------------------------------------------------------------------------------------------------|----------------------------------------------------------------------------------------------------------------------------------------|----------------------------------------------------------------------------------------------------------------------------------------|----------------------------------------------------------------------------------------------------------------------------------------|----------------------------------------------------------------------------------------------------------------------------------------|----------------------------------------------------------------------------------------------------------------------------------------|
| <b>Standing balance</b>                                                                                                                                                                                                                                                               |                                                                                                                                        |                                                                                                                                        |                                                                                                                                        |                                                                                                                                        |                                                                                                                                        |
| Sit-to-stand                                                                                                                                                                                                                                                                          | STS WH                                                                                                                                 | STS NS                                                                                                                                 | Hold half STS WS                                                                                                                       | Hold half STS NS                                                                                                                       |                                                                                                                                        |
| One leg stance                                                                                                                                                                                                                                                                        | 1LS WH                                                                                                                                 | 1LS NS                                                                                                                                 | 1LS medium-density form WS                                                                                                             | 1LS medium-density form NS                                                                                                             | Eyes closed 1LS medium-density form WS                                                                                                 |
| Stepper                                                                                                                                                                                                                                                                               |                                                                                                                                        |                                                                                                                                        |                                                                                                                                        | Step up and down WH                                                                                                                    | Step up and down NS                                                                                                                    |
| Medium-density foam rubber mat                                                                                                                                                                                                                                                        |                                                                                                                                        | DS/ tandem stance WH (EO)                                                                                                              | DS/ tandem stance WH (EC)                                                                                                              | Single stance WH (EO)                                                                                                                  | Single stance WH (EC)                                                                                                                  |
| <b>Other variations</b>                                                                                                                                                                                                                                                               |                                                                                                                                        | Croquet (week 4)                                                                                                                       |                                                                                                                                        | Hula-hoop (week 8)                                                                                                                     |                                                                                                                                        |
| <b>Warming down</b>                                                                                                                                                                                                                                                                   | When sitting, breath in through nose while lifting up UL and breath out through mouth while bringing down the UL to starting position. | When sitting, breath in through nose while lifting up UL and breath out through mouth while bringing down the UL to starting position. | When sitting, breath in through nose while lifting up UL and breath out through mouth while bringing down the UL to starting position. | When sitting, breath in through nose while lifting up UL and breath out through mouth while bringing down the UL to starting position. | When sitting, breath in through nose while lifting up UL and breath out through mouth while bringing down the UL to starting position. |
| <i>Notes:</i> ↑, increase; 1LS, one leg stance; BOS, base of support; DF, dorsiflex; DS, double stance; EO, eyes open; EC, eyes closed; HS, hold support; NS, no support; PF, plantarflex; reps, repetitions; ST, Side stepping; STS, sit to stand; UL, upper limb; WH, with support. |                                                                                                                                        |                                                                                                                                        |                                                                                                                                        |                                                                                                                                        |                                                                                                                                        |
